# Supplementary material for: Eg5 inhibitor YL001 induces mitotic arrest and inhibits tumor proliferation
Source: PubMed Central journal article supplement (PMC5522084; doi:10.18632/oncotarget.17207), 2017-04-18
Supplement: oncotarget-08-42510-s001.pdf [file oncotarget-08-42510-s001.pdf]

# Eg5 inhibitor YL001 induces mitotic arrest and inhibits tumor proliferation

## Supplementary Materials

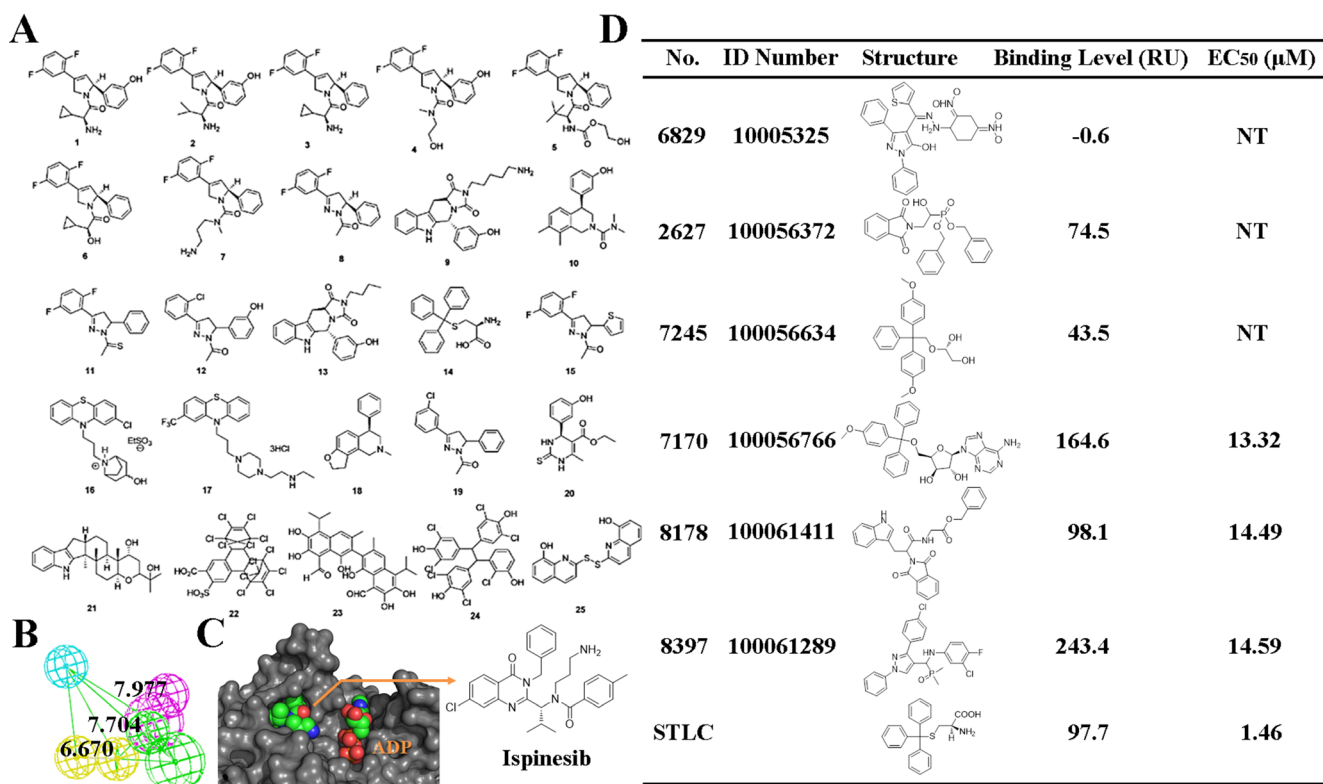

**Supplementary Figure 1: Develop Eg5 inhibitors via receptor-ligand interaction-based virtual screening round one.** (A) 2D chemical structures of the 28 molecules forming the training set used to obtain the HypoGen pharmacophore hypothesis. (B) Top-scoring HypoGen pharmacophore Hypo 1. Features are color-coded as follows: aromatic ring (orange); hydrogen-bond acceptor (green); hydrophobic (blue); hydrogen-bond donor (violet). (C) All compounds in the database tested interacted with the allosteric pocket which is occupied by Ispinesib in the picture (GOLD). PDB ID: 4AP0. (D) Low weight molecule screening of the six manually selected compounds: Binding level (Response Unit, RU) was evaluated with SPR Biacore T200 and EC<sub>50</sub> was assessed with the Alamar Blue assay in cervical cancer cell line HeLa. STLC was used as a control.

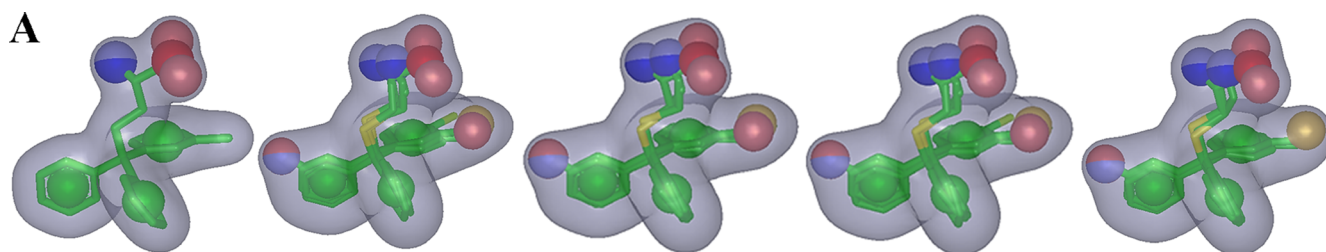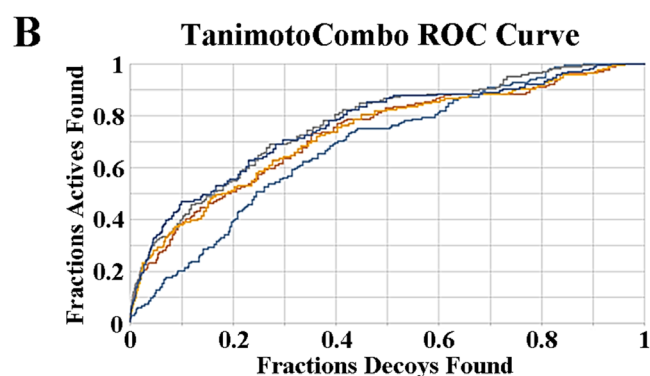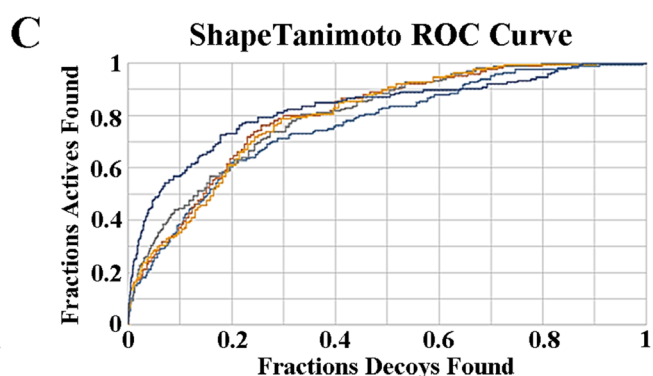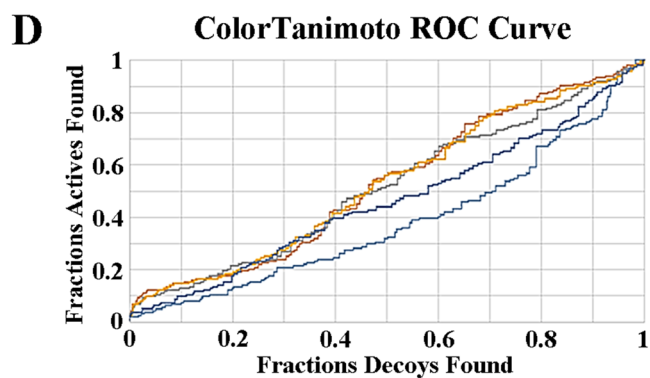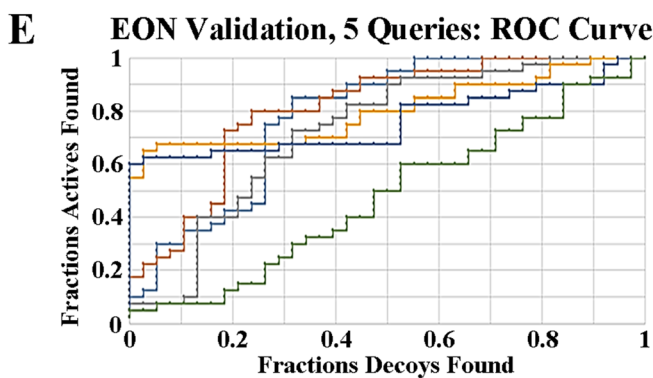

**F**

| Query5 ShapeTanimoto (Average [95% Confidence]) |                         |
|-------------------------------------------------|-------------------------|
| AUC                                             | 0.827 [0.788, 0.863]    |
| 0.5% Enrichment                                 | 28.765 [16.216, 43.709] |
| 1.0% Enrichment                                 | 22.924 [16.168, 30.387] |
| 2.0% Enrichment                                 | 15.885 [11.988, 20.000] |

**Supplementary Figure 2: ROCS and EON query validation ROC curves.** (A) Five aligned queries generated by vROCS. From left to right: query 1 to query 5. (B) ROCS validation: ROC curve of five aligned queries. Scoring function: Tanimoto Combo. (C) ROCS validation: ROC curve of five aligned queries. Scoring function: Shape Tanimoto. (D) ROCS validation: ROC curve of five aligned queries. Scoring function: Color Tanimoto. In B-D, query 1 (light blue line), query 2 (red line), query 3 (grey line), query 4 (yellow line), query 5 (deep blue line). (E) EON validation: ROC curve of five single molecule queries. Scoring function: ET\_Combo. 2XAE\_2XA (ligand 2XA from crystal structure PDB ID: 2XAE, same pattern below, light blue line), 3KEN\_ZZD (red line), 4A50\_DQ6 (grey line), 4A51\_DQ8 (yellow line), 4BBG\_V02 (deep blue line), NO\_EON (Shape Tanimoto score of hit list compounds, not rescored by EON, green line) (F) AUC and enrichment factors of query 5 using the scoring metric Shape Tanimoto.

**YL001**

468 Assays Tested  
2 Interactions Mapped  
S-Score(35) = 0.00

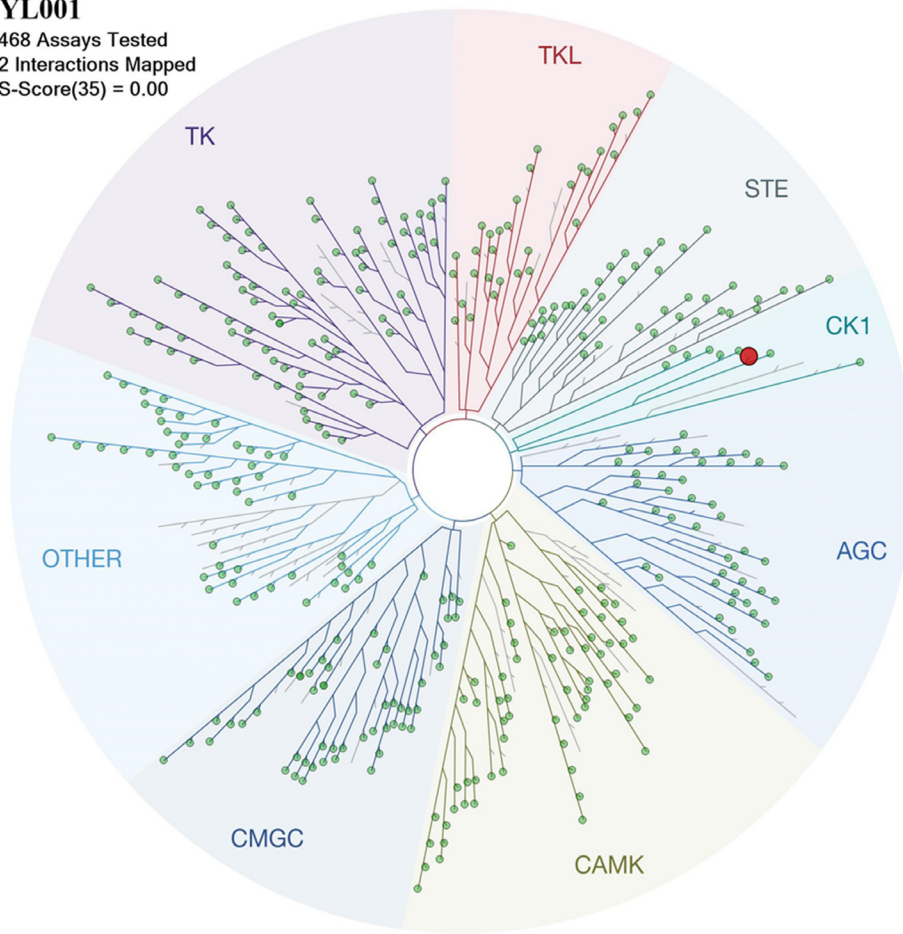

ATYPICAL

MUTANT

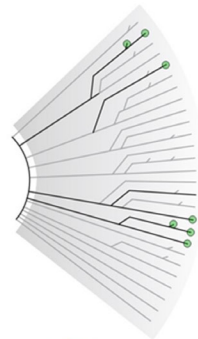

LIPID

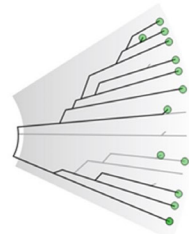

PATHOGEN

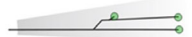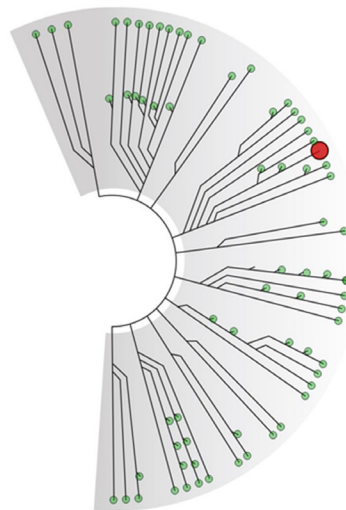

**Supplementary Figure 3: Kinase Profiling data visualized as interaction tree maps.** Kinase Profiling was used to evaluate activity of YL001 against a panel of 468 distinct human protein kinases, including typical, atypical, mutant ones. When YL001 inhibition to a kinase is over 35%, the kinase will be marked with red circle, where larger circle indicates higher-affinity binding.

**Supplementary Table 1: SPR screening and antiproliferation screening of 23 manual selected compounds**

| Pick No. | Assay No. | Specs Compound ID | Binding Level (RU) | Inhibition (50 $\mu$ M) |
|----------|-----------|-------------------|--------------------|-------------------------|
| 1        | 3         | AG-401/37257005   | 18.8               | 95.06%                  |
| 2        | 18        | AG-205/13765047   | 3.4                | -18.48%                 |
| 3        | 12        | AN-919/14547075   | 69.6               | 27.56%                  |
| 4        | 16        | AG-690/36921098   | 61.1               | 21.81%                  |
| 5        | 11        | AN-919/14547113   | 1.9                | 21.56%                  |
| 6        | 15        | AJ-292/15089069   | 100.1              | 58.97%                  |
| 7        | 13        | AN-919/14547078   | 56.6               | 30.07%                  |
| 8        | 9         | AN-465/13570058   | 7.4                | 98.24%                  |
| 9        | 6         | AG-227/37394007   | 8.7                | 97.78%                  |
| 10       | 20        | AK-778/11811129   | 59.8               | 9.38%                   |
| 11       | 22        | AH-487/42271989   | 31.9               | 41.63%                  |
| 12       | 8         | AN-919/14545008   | 57.7               | 26.79%                  |
| 13       | 10        | AG-205/14740101   | 27.7               | 0.87%                   |
| 14       | 14        | AF-399/14739190   | 36.9               | 22.02%                  |
| 15       | 21        | AF-399/41981012   | 3.8                | 14.85%                  |
| 16       | 23        | AP-906/42853823   | 60.7               | 19.16%                  |
| 17       | 17        | AE-842/33003047   | 14.6               | -30.66%                 |
| 18       | 2         | AG-205/33162003   | 32.8               | 60.89%                  |
| 19       | 7         | AG-205/13460017   | 44.5               | 30.78%                  |
| 20       | 5         | AM-807/14957480   | 16.3               | 30.76%                  |
| 21       | 4         | AK-777/10805059   | 20.7               | 31.51%                  |
| 22       | 19        | AO-081/41364431   | 56.4               | 29.79%                  |
| 23       | 1         | AQ-714/41675002   | 2.3                | 32.65%                  |
| -        | -         | STLC              | 101.4              | -                       |

Proliferation inhibition was calculated with Alamar Blue. Binding level was evaluated with SPR. STLC was used as a control. Pick No. refers to the compound's EON ranking; the higher the ET\_Combos, the lower the Pick No.

**Supplementary Table 2: EC<sub>50</sub>s (μM) of the YL001 in a breast cancer cell and a normal cell line**

| Cell lines         | Type       | Source             | EC <sub>50</sub> of YL001 (μM) |
|--------------------|------------|--------------------|--------------------------------|
| MCF-7              | Epithelial | Breast cancer      | 14.90 ± 2.57                   |
| MCF10A             | Epithelial | Breast normal cell | >100                           |
| Therapeutic window |            |                    | >6.7                           |

The therapeutic window is a ratio of the minimum effective concentration (EC<sub>50</sub> on MCF-7) to the minimum toxic concentration (EC<sub>50</sub> on MCF10A).
